# Supplementary material for: A Time-Series Metabolomic Analysis of SARS-CoV-2 Infection in a Ferret Model
Source: MDPI journal article supplement (doi:10.3390/metabo12111151), 2022-11-21
Supplement: s1 [file s1]

## Supplementary Materials

**Table S1.** Composition of QC mix standards (1 ppm) applied to assess the variability of the LC-QQQ-MS metabolomic analysis for central carbon metabolites.

| QC Standard     | RSD (%) |
|-----------------|---------|
| L-Arginine      | 6.11    |
| L-Histidine     | 9.58    |
| L-Proline       | 5.96    |
| L-Serine        | 4.36    |
| L-Cystine       | 7.39    |
| L-Threonine     | 3.73    |
| L-Homoserine    | 6.79    |
| L-Methionine    | 4.76    |
| L-Isoleucine    | 5.29    |
| L-Leucine       | 4.51    |
| L-Tyrosine      | 8.21    |
| L-Glutamic acid | 5.48    |
| L-Phenylalanine | 4.00    |
| L-Aspartic Acid | 3.33    |
| Lactic acid     | 11.07   |
| Succinic acid   | 4.40    |

**Table S2.** Composition of PBQC metabolites applied to assess the variability of the LC-QQQ-MS metabolomic analysis for central carbon metabolites.

| PBQC metabolite                          | RSD (%) |
|------------------------------------------|---------|
| L-Glutamine                              | 8.23    |
| 4-Guanidobutyric acid                    | 8.64    |
| L-Tyrosine                               | 7.85    |
| Pyridoxal hydrochloride                  | 8.75    |
| Inosine                                  | 7.68    |
| 2-Deoxyinosine                           | 5.78    |
| L-Kynurenine                             | 8.06    |
| Guanosine                                | 5.83    |
| L-Glutamic acid                          | 2.14    |
| L-Phenylalanine                          | 2.68    |
| L-Aspartic Acid                          | 2.30    |
| Uric acid                                | 9.28    |
| Thymidine                                | 7.15    |
| D-Gluconic acid                          | 4.32    |
| Galactonic acid                          | 4.21    |
| L-Dihydroorotic acid                     | 4.07    |
| N-Acetyl-alpha-D-glucosamine 1-phosphate | 8.82    |
| N-Acetyl-D-glucosamine 6-phosphate       | 8.82    |
| D-Sedoheptulose-7-phosphate              | 5.14    |
| Nicotinic acid                           | 9.29    |
| 4-Hydroxybenzoic acid                    | 8.49    |
| D-pantothenic acid                       | 7.99    |
| Maleic acid                              | 9.66    |
| Malonic acid                             | 7.69    |
| Succinic acid                            | 1.77    |

| PBQC metabolite              | RSD (%) |
|------------------------------|---------|
| Vanillic acid                | 9.72    |
| m-Hydroxybenzoic acid        | 6.63    |
| L-Malic acid                 | 5.71    |
| L-Hydroxyglutaric acid       | 6.12    |
| N-Acetylglutamic acid        | 8.07    |
| Isopentyl acetate            | 6.36    |
| 4-Hydroxyphenyl-pyruvic acid | 8.81    |
| D-Fructose 1,6-biphosphate   | 5.78    |
| 4-Pyridoxic acid             | 8.40    |

Note: Only metabolite features with RSDs  $\leq 10\%$  are represented in the table.

**Table S3.** Cross-validation (CV)-ANOVA of the PLS-DA metabolomics model (**Figure S2**)

| PLS-DA<br>(Figure S2) | SS          | D<br>F  | MS          | F-<br>statistic | p-<br>value  | SD           |
|-----------------------|-------------|---------|-------------|-----------------|--------------|--------------|
| Total corr.           | 400         | 4<br>00 | 1           |                 |              | 1            |
| Regression            | 24.3<br>018 | 2<br>0  | 1.21<br>509 | 1.229           | 0.226<br>342 | 1.102<br>31  |
| Residual              | 375.<br>698 | 3<br>80 | 0.98<br>868 |                 |              | 0.994<br>324 |

In this table, SS: sum-of-squares, DF: degrees of freedom, MS: mean squares, SD: standard deviation

**Table S4.** Cross-validation (CV)-ANOVA of the OPLS-DA metabolomics model (**Figure 2**)

| PLS-DA<br>(Figure 2) | SS          | D<br>F  | MS           | F-<br>statistic | p-<br>value   | SD           |
|----------------------|-------------|---------|--------------|-----------------|---------------|--------------|
| Total corr.          | 400         | 4<br>00 | 1            |                 |               | 1            |
| Regression           | 60.0<br>163 | 4<br>0  | 1.500<br>41  | 1.588<br>74     | 0.015<br>8789 | 1.224<br>91  |
| Residual             | 339.<br>984 | 3<br>60 | 0.944<br>399 |                 |               | 0.971<br>802 |

In this table, SS: sum-of-squares, DF: degrees of freedom, MS: mean squares, SD: standard deviation

**Table S5.** Pathway enrichment analysis of the central carbon metabolic pathways using the central carbon metabolism dataset.

| Metabolic pathway                                   | Total | Expected | Hits | Raw<br><i>p</i> -value | Holm<br><i>p</i> -value | FDR     | Enrichment ratio |
|-----------------------------------------------------|-------|----------|------|------------------------|-------------------------|---------|------------------|
| Pentose phosphate pathway                           | 22    | 1.17     | 7    | <0.0001                | 0.00699                 | 0.00699 | 5.982906         |
| Pentose and glucuronate interconversions            | 18    | 0.958    | 6    | 0.0002                 | 0.0174                  | 0.00881 | 6.263048         |
| Arginine biosynthesis                               | 14    | 0.745    | 5    | 0.0005                 | 0.0424                  | 0.0145  | 6.711409         |
| Starch and sucrose metabolism                       | 18    | 0.958    | 5    | 0.0019                 | 0.151                   | 0.0373  | 5.219207         |
| D-Glutamine and D-glutamate metabolism              | 6     | 0.319    | 3    | 0.0026                 | 0.207                   | 0.0373  | 9.404389         |
| Alanine, aspartate and glutamate metabolism         | 28    | 1.49     | 6    | 0.0028                 | 0.219                   | 0.0373  | 4.026846         |
| Citrate cycle (TCA cycle)                           | 20    | 1.06     | 5    | 0.0031                 | 0.243                   | 0.0373  | 4.716981         |
| Butanoate metabolism                                | 15    | 0.798    | 4    | 0.0065                 | 0.499                   | 0.0625  | 5.012531         |
| Valine, leucine and isoleucine biosynthesis         | 8     | 0.426    | 3    | 0.0067                 | 0.509                   | 0.0625  | 7.042254         |
| Amino sugar and nucleotide sugar metabolism         | 37    | 1.97     | 6    | 0.0116                 | 0.872                   | 0.0977  | 3.045685         |
| Phenylalanine, tyrosine and tryptophan biosynthesis | 4     | 0.213    | 2    | 0.0157                 | 1                       | 0.12    | 9.389671         |
| Glyoxylate and dicarboxylate metabolism             | 32    | 1.7      | 5    | 0.0244                 | 1                       | 0.171   | 2.941176         |
| Nicotinate and nicotinamide metabolism              | 15    | 0.798    | 3    | 0.0416                 | 1                       | 0.269   | 3.759398         |
| Ascorbate and aldarate metabolism                   | 8     | 0.426    | 2    | 0.0636                 | 1                       | 0.381   | 4.694836         |
| Phenylalanine metabolism                            | 10    | 0.532    | 2    | 0.0954                 | 1                       | 0.534   | 3.759398         |
| Galactose metabolism                                | 27    | 1.44     | 3    | 0.1700                 | 1                       | 0.894   | 2.083333         |
| Histidine metabolism                                | 16    | 0.852    | 2    | 0.2080                 | 1                       | 1       | 2.347418         |
| Aminoacyl-tRNA biosynthesis                         | 48    | 2.55     | 4    | 0.2500                 | 1                       | 1       | 1.568627         |
| Glycine, serine and threonine metabolism            | 33    | 1.76     | 3    | 0.2550                 | 1                       | 1       | 1.704545         |
| Pantothenate and CoA biosynthesis                   | 19    | 1.01     | 2    | 0.2680                 | 1                       | 1       | 1.980198         |
| Nitrogen metabolism                                 | 6     | 0.319    | 1    | 0.2800                 | 1                       | 1       | 3.134796         |

| Metabolic pathway                          | Total | Expected | Hits | Raw<br><i>p</i> -value | Holm<br><i>p</i> -value | FDR | Enrichment ratio |
|--------------------------------------------|-------|----------|------|------------------------|-------------------------|-----|------------------|
| Fructose and mannose metabolism            | 20    | 1.06     | 2    | 0.2890                 | 1                       | 1   | 1.886792         |
| Propanoate metabolism                      | 23    | 1.22     | 2    | 0.3490                 | 1                       | 1   | 1.639344         |
| Taurine and hypotaurine metabolism         | 8     | 0.426    | 1    | 0.3550                 | 1                       | 1   | 2.347418         |
| Purine metabolism                          | 65    | 3.46     | 4    | 0.4590                 | 1                       | 1   | 1.156069         |
| Inositol phosphate metabolism              | 30    | 1.6      | 2    | 0.4810                 | 1                       | 1   | 1.25             |
| Glycerolipid metabolism                    | 16    | 0.852    | 1    | 0.5850                 | 1                       | 1   | 1.173709         |
| Pyrimidine metabolism                      | 39    | 2.08     | 2    | 0.6250                 | 1                       | 1   | 0.961538         |
| beta-Alanine metabolism                    | 21    | 1.12     | 1    | 0.6850                 | 1                       | 1   | 0.892857         |
| Sphingolipid metabolism                    | 21    | 1.12     | 1    | 0.6850                 | 1                       | 1   | 0.892857         |
| Glycolysis / Gluconeogenesis               | 26    | 1.38     | 1    | 0.7620                 | 1                       | 1   | 0.724638         |
| Glutathione metabolism                     | 28    | 1.49     | 1    | 0.7870                 | 1                       | 1   | 0.671141         |
| Phosphatidylinositol signaling system      | 28    | 1.49     | 1    | 0.7870                 | 1                       | 1   | 0.671141         |
| Porphyrin and chlorophyll metabolism       | 30    | 1.6      | 1    | 0.8090                 | 1                       | 1   | 0.625            |
| Cysteine and methionine metabolism         | 33    | 1.76     | 1    | 0.8390                 | 1                       | 1   | 0.568182         |
| Glycerophospholipid metabolism             | 36    | 1.92     | 1    | 0.8640                 | 1                       | 1   | 0.520833         |
| Arginine and proline metabolism            | 38    | 2.02     | 1    | 0.8780                 | 1                       | 1   | 0.49505          |
| Valine, leucine and isoleucine degradation | 40    | 2.13     | 1    | 0.8910                 | 1                       | 1   | 0.469484         |
| Tryptophan metabolism                      | 41    | 2.18     | 1    | 0.8970                 | 1                       | 1   | 0.458716         |
| Primary bile acid biosynthesis             | 46    | 2.45     | 1    | 0.9220                 | 1                       | 1   | 0.408163         |

**Table S6.** Multivariate ANOVA analysis of a metabolomics-derived dataset of nasal wash samples collected from ferrets at several time-points.

| Metabolite feature        | KEG<br>G ID | F-<br>statistic | FD<br>R      | Fisher's LSD                                                                                                                    |
|---------------------------|-------------|-----------------|--------------|---------------------------------------------------------------------------------------------------------------------------------|
| D-Sedoheptulose-7-P       | C053<br>82  | 14.60<br>7      | 3.59<br>E-08 | 14 dpi > Pre; 3 dpi > 5 dpi; 3 dpi > Pre; 7 dpi > 5 dpi; 5 dpi > Pre; 7 dpi > Pre; 9 dpi > Pre                                  |
| N-Acetyl D-galactosamine  | C011<br>32  | 14.24<br>1      | 3.59<br>E-08 | 14 dpi > 5 dpi; 14 dpi > Pre; 3 dpi > 5 dpi; 3 dpi > Pre; 5 dpi > Pre; 7 dpi > Pre; 9 dpi > Pre                                 |
| Uric acid                 | C003<br>66  | 10.42<br>5      | 3.55<br>E-06 | 5 dpi > 14 dpi; Pre > 14 dpi; 5 dpi > 3 dpi; Pre > 3 dpi; 5 dpi > 7 dpi; 5 dpi > 9 dpi; 9 dpi > 7 dpi; Pre > 7 dpi; Pre > 9 dpi |
| Vanillic acid             | C066<br>72  | 7.475           | 0.00<br>0172 | 5 dpi > 14 dpi; Pre > 14 dpi; 5 dpi > 3 dpi; Pre > 3 dpi; 5 dpi > 7 dpi; 5 dpi > 9 dpi; Pre > 7 dpi                             |
| Taurine                   | C002<br>45  | 7.438           | 0.00<br>0172 | 14 dpi > 3 dpi; 14 dpi > 7 dpi; 14 dpi > Pre; 3 dpi > Pre; 5 dpi > Pre; 7 dpi > Pre; 9 dpi > Pre                                |
| Phenylpyruvic acid        | C001<br>66  | 7.318           | 0.00<br>0172 | 5 dpi > 14 dpi; Pre > 14 dpi; 5 dpi > 3 dpi; Pre > 3 dpi; 5 dpi > 7 dpi; 5 dpi > 9 dpi; Pre > 7 dpi; Pre > 9 dpi                |
| Nicotinic acid            | C002<br>53  | 6.868           | 0.00<br>0299 | Pre > 14 dpi; Pre > 3 dpi; Pre > 5 dpi; Pre > 7 dpi; Pre > 9 dpi                                                                |
| L-2-Hydroxyglutaric acid  | C026<br>30  | 5.869           | 0.00<br>1277 | 5 dpi > 14 dpi; 7 dpi > 14 dpi; 9 dpi > 14 dpi; Pre > 14 dpi; 5 dpi > 3 dpi; Pre > 3 dpi; Pre > 7 dpi; Pre > 9 dpi              |
| 2,3-Dihydroxyisovalerate  | C040<br>39  | 5.806           | 0.00<br>1277 | 3 dpi > 14 dpi; 5 dpi > 14 dpi; 7 dpi > 14 dpi; 9 dpi > 14 dpi; Pre > 14 dpi; Pre > 3 dpi; Pre > 5 dpi; Pre > 7 dpi             |
| Mevalonic acid            | C004<br>18  | 5.724           | 0.00<br>1315 | 3 dpi > 14 dpi; 5 dpi > 14 dpi; 7 dpi > 14 dpi; 9 dpi > 14 dpi; Pre > 14 dpi                                                    |
| D-pantothenic acid        | C008<br>64  | 5.506           | 0.00<br>1709 | Pre > 14 dpi; Pre > 3 dpi; Pre > 5 dpi; Pre > 7 dpi; Pre > 9 dpi                                                                |
| Malonic acid              | C003<br>83  | 4.888           | 0.00<br>4381 | 3 dpi > 14 dpi; 3 dpi > 5 dpi; 3 dpi > 9 dpi; 3 dpi > Pre                                                                       |
| 2,3-Dihydroxybenzoic acid | C001<br>96  | 4.766           | 0.00<br>4961 | 5 dpi > 14 dpi; 5 dpi > 3 dpi; Pre > 3 dpi; 5 dpi > 7 dpi; 5 dpi > 9 dpi; Pre > 7 dpi                                           |
| L-Maltose                 | C002<br>08  | 4.435           | 0.00<br>8063 | Pre > 3 dpi; Pre > 5 dpi; Pre > 7 dpi; Pre > 9 dpi                                                                              |
| L-Phenylalanine           | C000<br>79  | 4.149           | 0.01<br>2247 | Pre > 14 dpi; Pre > 3 dpi; 5 dpi > 7 dpi; Pre > 7 dpi; Pre > 9 dpi                                                              |
| 2-Deoxycytidine 5'-diP    | C007<br>05  | 4.018           | 0.01<br>4351 | 14 dpi > 3 dpi; 14 dpi > 5 dpi; 14 dpi > 7 dpi; 14 dpi > 9 dpi; 14 dpi > Pre; 7 dpi > Pre                                       |
| 3-Hydroxyanthranilic acid | C006<br>32  | 3.948           | 0.01<br>5249 | 5 dpi > 3 dpi; 9 dpi > 3 dpi; 5 dpi > 7 dpi; 9 dpi > 7 dpi                                                                      |
| Citramalic acid           | C008<br>15  | 3.744           | 0.01<br>9342 | 14 dpi > 3 dpi; 14 dpi > 5 dpi; 14 dpi > 7 dpi; 14 dpi > 9 dpi; 14 dpi > Pre                                                    |
| D-Galactosamine           | C022<br>62  | 3.697           | 0.01<br>9931 | 14 dpi > 3 dpi; 14 dpi > 5 dpi; 14 dpi > Pre; 7 dpi > Pre; 9 dpi > Pre                                                          |
| L-Malic acid              | C001<br>49  | 3.596           | 0.02<br>2602 | 3 dpi > 14 dpi; 3 dpi > 5 dpi; 3 dpi > 9 dpi; 3 dpi > Pre; 7 dpi > Pre                                                          |
| N-Acetylneuraminic acid   | C199<br>10  | 3.415           | 0.02<br>9465 | 3 dpi > Pre; 5 dpi > Pre; 9 dpi > Pre                                                                                           |

|                       |            |       |              |                                                    |
|-----------------------|------------|-------|--------------|----------------------------------------------------|
| Succinic acid         | C000<br>42 | 3.371 | 0.02<br>9911 | Pre > 5 dpi; Pre > 7 dpi; Pre > 9 dpi              |
| m-Hydroxybenzoic acid | C005<br>87 | 3.356 | 0.02<br>9911 | Pre > 3 dpi; Pre > 7 dpi; Pre > 9 dpi              |
| L-Sorbose             | C083<br>56 | 3.332 | 0.02<br>9934 | Pre > 3 dpi; Pre > 5 dpi; Pre > 7 dpi; Pre > 9 dpi |

**Table S6 (cont.).** Multivariate ANOVA analysis of a metabolomics-derived dataset of nasal wash samples collected from ferrets at several time-points.

| Metabolite feature                    | KEG<br>G ID | F-<br>statistic | FD<br>R      | Fisher's LSD                                                                              |
|---------------------------------------|-------------|-----------------|--------------|-------------------------------------------------------------------------------------------|
| L-Serine                              | C007<br>16  | 3.259           | 0.03<br>2611 | 3 dpi > Pre; 5 dpi > Pre; 7 dpi > Pre                                                     |
| Glyceric acid                         | C002<br>58  | 3.052           | 0.04<br>4086 | 3 dpi > 14 dpi; 5 dpi > 14 dpi; 7 dpi > 14 dpi; 9 dpi > 14 dpi; Pre > 14 dpi; Pre > 7 dpi |
| N-Acetyl- $\alpha$ -D-glucosamine 1-P | C042<br>56  | 3.022           | 0.04<br>4086 | 5 dpi > 14 dpi; 9 dpi > 14 dpi; 5 dpi > Pre; 9 dpi > Pre                                  |
| N-Acetyl-D-glucosamine 6-P            | C003<br>57  | 3.022           | 0.04<br>4086 | 5 dpi > 14 dpi; 9 dpi > 14 dpi; 5 dpi > Pre; 9 dpi > Pre                                  |

In this table, P: phosphate, Pre: Pre-infection, dpi: days post-infection

**Table S7.** Significant discovery metabolites observed through LC-QTOF-MS analysis

| Metabolite                            | F-statistic | FDR      | Formula    | Observed Mass | Theoretical mass | Mass error (ppm) |
|---------------------------------------|-------------|----------|------------|---------------|------------------|------------------|
| 2,3-Dimethylsuccinic acid             | 12.441      | 2.70E-07 | C6 H10 O4  | 146.0577      | 146.058457       | 5.182856         |
| (+)-Isomyristic acid                  | 11.447      | 3.67E-07 | C14 H28 O2 | 228.2089      | 228.209479       | 2.537149         |
| Stearolic acid                        | 11.383      | 3.67E-07 | C18 H32 O2 | 280.2403      | 280.240779       | 1.709247         |
| Monoolein                             | 10.786      | 6.22E-07 | C21 H40 O4 | 356.2925      | 356.293208       | 1.987131         |
| 3-hydroxy-hexadecanoic acid           | 9.7278      | 1.83E-06 | C16 H32 O3 | 272.2353      | 272.235693       | 1.443604         |
| 2-Hexyldecanoic acid                  | 6.0773      | 0.000285 | C16 H32 O2 | 256.2402      | 256.240779       | 2.259594         |
| Vanillylmandelic acid                 | 4.5567      | 0.00322  | C9 H10 O5  | 198.0548      | 198.053372       | 7.210126         |
| Phthalic acid Mono-2-ethylhexyl Ester | 3.6172      | 0.014693 | C16 H22 O4 | 278.1514      | 278.152358       | 3.444156         |

In this table, FDR: false discovery rate.

**Table S8.** Pathway enrichment and impact analysis of a metabolomics-derived dataset of nasal wash samples collected from ferrets.

| Metabolic pathway                                   | Total | Expected | Hits | Pathway enrichment analysis |              |        | Pathway impact analysis |              |        |        |
|-----------------------------------------------------|-------|----------|------|-----------------------------|--------------|--------|-------------------------|--------------|--------|--------|
|                                                     |       |          |      | Raw p-value                 | Holm p-value | FDR    | Raw p-value             | Holm p-value | FDR    | Impact |
| Phenylalanine, tyrosine and tryptophan biosynthesis | 4     | 0.0723   | 2    | 0.0019                      | 0.1610       | 0.1610 | 0.0018                  | 0.15516      | 0.1552 | 0.5000 |
| Phenylalanine metabolism                            | 10    | 0.1807   | 2    | 0.0134                      | 1            | 0.5630 | 0.0130                  | 1            | 0.5440 | 0.6190 |
| Butanoate metabolism                                | 15    | 0.2710   | 2    | 0.0296                      | 1            | 0.6210 | 0.0286                  | 1            | 0.8004 | 0.0000 |
| Citrate cycle (TCA cycle)                           | 20    | 0.3613   | 2    | 0.3120                      | 1            | 1      | 0.0489                  | 1            | 0.9776 | 0.0769 |
| Pentose phosphate pathway                           | 22    | 0.3974   | 2    | 0.0601                      | 1            | 1      | 0.0582                  | 1            | 0.9776 | 0.0278 |
| Glyoxylate and dicarboxylate metabolism             | 32    | 0.5781   | 2    | 0.4510                      | 1            | 1      | 0.1120                  | 1            | 1      | 0.0794 |
| Taurine and hypotaurine metabolism                  | 8     | 0.1445   | 1    | 0.1380                      | 1            | 1      | 0.1360                  | 1            | 1      | 0.4286 |
| Nicotinate and nicotinamide metabolism              | 15    | 0.2710   | 1    | 0.2440                      | 1            | 1      | 0.2402                  | 1            | 1      | 0.0000 |
| Glycerolipid metabolism                             | 16    | 0.2890   | 1    | 0.2580                      | 1            | 1      | 0.2541                  | 1            | 1      | 0.0935 |
| Starch and sucrose metabolism                       | 18    | 0.3252   | 1    | 0.2850                      | 1            | 1      | 0.2811                  | 1            | 1      | 0.0731 |
| Terpenoid backbone biosynthesis                     | 18    | 0.3252   | 1    | ND                          | ND           | ND     | 0.2811                  | 1            | 1      | 0.1143 |
| Pantothenate and CoA biosynthesis                   | 19    | 0.3432   | 1    | 0.2990                      | 1            | 1      | 0.2942                  | 1            | 1      | 0.0071 |
| Pyruvate metabolism                                 | 22    | 0.3974   | 1    | ND                          | ND           | ND     | 0.3322                  | 1            | 1      | 0.0311 |
| Propanoate metabolism                               | 23    | 0.4155   | 1    | 0.3500                      | 1            | 1      | 0.3445                  | 1            | 1      | 0.0000 |
| Alanine, aspartate and glutamate metabolism         | 28    | 0.5058   | 1    | 0.4080                      | 1            | 1      | 0.4025                  | 1            | 1      | 0.0000 |
| Glycine, serine and threonine metabolism            | 33    | 0.5961   | 1    | 0.4620                      | 1            | 1      | 0.4555                  | 1            | 1      | 0.0242 |
| Amino sugar and nucleotide sugar metabolism         | 37    | 0.6684   | 1    | 0.0285                      | 1            | 0.6210 | 0.4947                  | 1            | 1      | 0.0386 |
| Pyrimidine metabolism                               | 39    | 0.7045   | 1    | 0.5200                      | 1            | 1      | 0.5132                  | 1            | 1      | 0.0175 |
| Tryptophan metabolism                               | 41    | 0.7407   | 1    | 0.5380                      | 1            | 1      | 0.5311                  | 1            | 1      | 0.0516 |
| Primary bile acid biosynthesis                      | 46    | 0.8310   | 1    | 0.5800                      | 1            | 1      | 0.5731                  | 1            | 1      | 0.0076 |
| Fatty acid biosynthesis                             | 47    | 0.8490   | 1    | ND                          | ND           | ND     | 0.5810                  | 1            | 1      | 0.0000 |
| Aminoacyl-tRNA biosynthesis                         | 48    | 0.8671   | 1    | 0.5960                      | 1            | 1      | 0.5888                  | 1            | 1      | 0.0000 |
| Purine metabolism                                   | 65    | 1.1742   | 1    | 0.7090                      | 1            | 1      | 0.7019                  | 1            | 1      | 0.0000 |

In this table, ND: Not detected

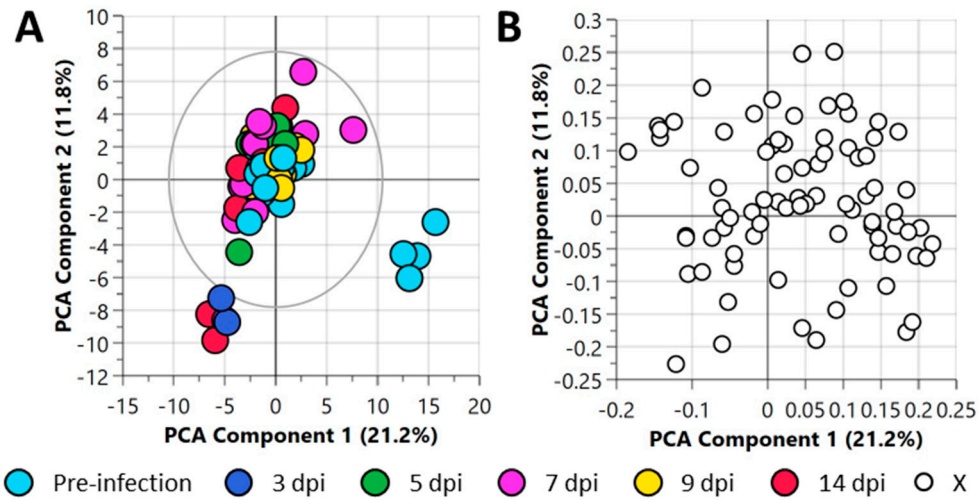

**Figure S1.** Principal component analysis (PCA) of the central carbon metabolism metabolite dataset of nasal wash samples collected from ferrets. **A.** PCA scatter plot, and **B.** PCA loadings plot. For this plot,  $R^2X$  (cum) = 0.525,  $Q^2$  = 0.305. The ellipse presented in panel **A** represents Hotelling's  $T^2$  confidence limit (95%). The colored circles in panel **A** represent each analyzed sample, while the white circles in panel **B** indicate the distribution of metabolite features between these groups.

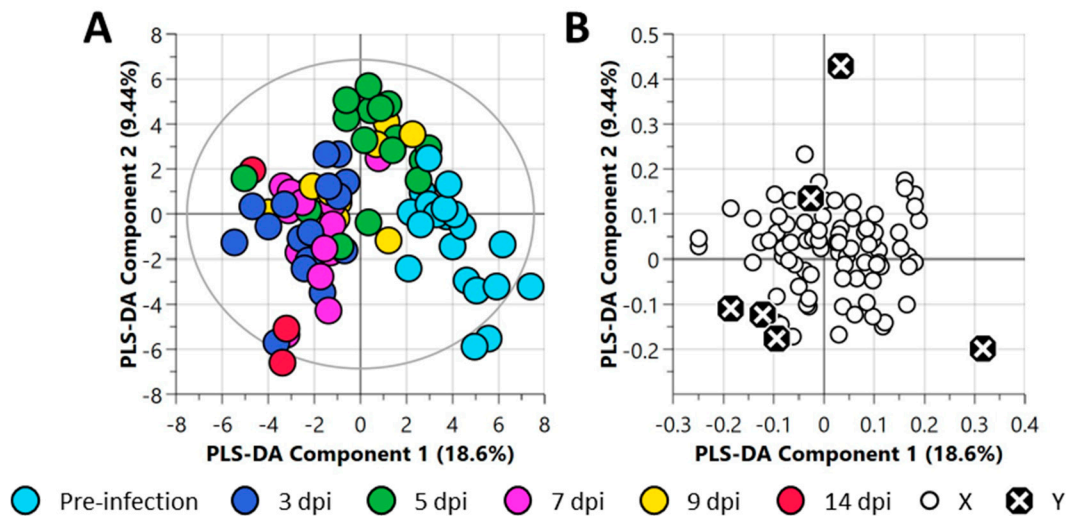

**Figure S2.** Partial least square discriminant analysis (PLS-DA) of the central carbon metabolism metabolite dataset of nasal wash samples collected from ferrets. **A.** PLS-DA scatter plot, and **B.** PLS-DA loadings plot. For this plot,  $R^2X$  (cum) = 0.28,  $R^2Y$  (cum) = 0.183,  $Q^2$  = 0.006. The ellipse presented in panel **A** represents Hotelling's  $T^2$  confidence limit (95%). The colored circles in panel **A** represent each analyzed sample, while the black crossed circles in panel **B** indicate the average group position for each sample cluster, with the white circles representing the distribution of metabolite features between these groups.
